# Supplementary material
Source: PubMed Central journal article supplement (PMC5875343)
Supplement: jamasurg-153-e180214-s001.pdf [file jamasurg-153-e180214-s001.pdf]

## Supplementary Online Content

Shah R, Attwood K, Arya S, et al. Association of frailty with failure to rescue after low-risk and high-risk inpatient surgery. *JAMA Surg*. Published online March 21, 2018. doi:10.1001/jamasurg.2018.0214

**eAppendix 1** 10 most common low risk procedures and 10 most common high risk procedures

**eAppendix 2** Mediation analysis

This supplementary material has been provided by the authors to give readers additional information about their work.

**eAppendix 1****10 most common low risk procedures**

|    | <b>CPT</b> | <b>COUNT</b> | <b>%</b> |                                                                                |
|----|------------|--------------|----------|--------------------------------------------------------------------------------|
| 1  | 44970      | 57637        | 11.1     | Laparoscopic procedures on the appendix                                        |
| 2  | 43644      | 44609        | 8.6      | Laparoscopy, with gastric bypass and Roux-en-Y gastroenterostomy               |
| 3  | 35301      | 41348        | 7.9      | Thromboendarterectomy Procedures on Arteries and Veins                         |
| 4  | 47562      | 37211        | 7.2      | Laparoscopic Procedures on the Biliary Tract                                   |
| 5  | 27447      | 25146        | 4.8      | Knee Replacement Surgery (Arthroplasty)                                        |
| 6  | 44204      | 19716        | 3.8      | Laparoscopic Excision Procedures on the Intestines                             |
| 7  | 19303      | 17962        | 3.4      | Mastectomy                                                                     |
| 8  | 49560      | 16555        | 3.2      | Hernioplasty, Herniorrhaphy, Herniotomy Procedures                             |
| 9  | 47563      | 15841        | 3.1      | Laparoscopic cholecystectomy                                                   |
| 10 | 27130      | 14514        | 2.8      | Repair, Revision, and/or Reconstruction Procedures on the Pelvis and Hip Joint |

**10 most common high risk procedures**

|    | <b>CPT</b> | <b>COUNT</b> | <b>%</b> |                                                                         |
|----|------------|--------------|----------|-------------------------------------------------------------------------|
| 1  | 44140      | 26115        | 5.6      | Colectomy, partial                                                      |
| 2  | 44120      | 19184        | 4.1      | Enterectomy, resection of small intestine                               |
| 3  | 44160      | 12221        | 2.6      | Colectomy with removal of terminal ileum and ileocolostomy              |
| 4  | 49000      | 12092        | 2.6      | Exploratory laparotomy, exploratory celiotomy with or without biopsy(s) |
| 5  | 47600      | 10559        | 2.3      | Excision Procedures on the Biliary Tract                                |
| 6  | 44145      | 10303        | 2.2      | Partial colectomy with coloproctostomy                                  |
| 7  | 44005      | 10070        | 2.2      | Enterolysis                                                             |
| 8  | 44143      | 8507         | 1.8      | Partial colectomy with end colostomy                                    |
| 9  | 34802      | 7412         | 1.6      | Endovascular Repair of Abdominal Aortic Aneurysm                        |
| 10 | 27880      | 7123         | 1.5      | Amputation Procedures on the Leg (Tibia and Fibula) and Ankle Joint     |

**eAppendix 2****Mediation analysis**

| <b>Major Complication</b>            |                  |                |                  |                |
|--------------------------------------|------------------|----------------|------------------|----------------|
|                                      | <b>Low Risk</b>  |                | <b>High Risk</b> |                |
| <b>Association</b>                   | <b>beta (SE)</b> | <b>p-value</b> | <b>beta (SE)</b> | <b>p-value</b> |
| RAI → Mortality (FTR)                | 0.143 (0.003)    | < 0.001        | 0.097 (0.001)    | < 0.001        |
| RAI → Complication                   | 0.079 (0.001)    | < 0.001        | 0.055 (0.0004)   | < 0.001        |
| Complication → Mortality (FTR)       | 2.068 (0.024)    | < 0.001        | 1.212 (0.007)    | < 0.001        |
| RAI (Complication) → Mortality (FTR) |                  |                |                  |                |
| Direct                               | 0.088 (0.003)    | < 0.001        | 0.076 (0.001)    | < 0.001        |
| Indirect (through Complications)     | 0.055 (0.004)    | < 0.001        | 0.020 (0.001)    | < 0.001        |
| <b>Any Complication</b>              |                  |                |                  |                |
|                                      | <b>Low Risk</b>  |                | <b>High Risk</b> |                |
| <b>Association</b>                   | <b>beta (SE)</b> | <b>p-value</b> | <b>beta (SE)</b> | <b>p-value</b> |
| RAI → Mortality (FTR)                | 0.143 (0.003)    | < 0.001        | 0.097 (0.001)    | < 0.001        |
| RAI → Complication                   | 0.078 (0.001)    | < 0.001        | 0.052 (0.0004)   | < 0.001        |
| Complication → Mortality (FTR)       | 2.056 (0.025)    | < 0.001        | 1.160 (0.007)    | < 0.001        |
| RAI (Complication) → Mortality (FTR) |                  |                |                  |                |
| Direct                               | 0.083 (0.003)    | < 0.001        | 0.076 (0.001)    | < 0.001        |
| Indirect (through Complications)     | 0.060 (0.004)    | < 0.001        | 0.021 (0.001)    | < 0.001        |

*RAI- Risk Analysis Index, FTR- Failure to rescue*
